# Supplementary material for: Allogeneic stem cell transplantation in fully MHC-matched Mauritian cynomolgus macaques recapitulates diverse human clinical outcomes
Source: PubMed Central journal article supplement (PMC5681693; doi:10.1038/s41467-017-01631-z), 2017-11-10
Supplement: 41467_2017_1631_MOESM2_ESM.pdf [file 41467_2017_1631_MOESM2_ESM.pdf]

**Editorial Note:** This manuscript has been previously reviewed at another journal that is not operating a transparent peer review scheme. This document only contains reviewer comments and rebuttal letters for versions considered at Nature Communications.
